# Supplementary material for: Experiences and needs of persons living with a household member infected with SARS-CoV-2: A mixed method study
Source: PLOS journal article supplement (doi:10.1371/journal.pone.0249391), 2021-03-31
Supplement: S1 (10.1371/journal.pone.0249391.s001) [file journal.pone.0249391.s001.pdf]

## S1. File. Questionnaires

Baseline household questionnaire, only filled in by the head of the household

| NR. | BASELINE HOUSEHOLD QUESTIONNAIRE                                                                                                     | ANSWER OPTION                                                                                                       |
|-----|--------------------------------------------------------------------------------------------------------------------------------------|---------------------------------------------------------------------------------------------------------------------|
| 1   | Number of people within the household?                                                                                               | Number                                                                                                              |
| 2   | What is the type of the household?                                                                                                   | couple/family/student accommodation/friends/other                                                                   |
| 3   | Description of your household?                                                                                                       | Open text field                                                                                                     |
| 4   | How many bedrooms do you have within your house?                                                                                     | Number                                                                                                              |
| 5   | Does everybody sleep in their own bed?                                                                                               | Yes / No                                                                                                            |
| 6   | How many people within the household share a bed?                                                                                    | Number                                                                                                              |
| 7   | Did the index case shared a bed with a household member in the past two weeks?                                                       | Yes / No                                                                                                            |
| 8   | Number of toilets in the house?                                                                                                      | 1/2/more than 2                                                                                                     |
| 9   | Presence of a sink within the toilet room?                                                                                           | Yes, all toilets/Yes, but not all toilets/No                                                                        |
| 10  | Do you have pets? (more answers possible)                                                                                            | No/Dog/Cat/Rodents/Other                                                                                            |
| 11  | In the past 14 days, how often did you or someone in your household receive visitors in the home?                                    | less than once a week/1-3 times a week/more than 3 times a week                                                     |
| 12  | Over the past week there have been enough supplies of the following materials in my home to prevent spread of coronavirus infection: |                                                                                                                     |
|     | • Hand sanitizer (minimum 60% alcohol)                                                                                               | Strongly disagree- disagree-somewhat disagree –neither agree nor disagree – somewhat agree – agree – strongly agree |
|     | • Soap                                                                                                                               | Strongly disagree- disagree-somewhat disagree –neither agree nor disagree – somewhat agree – agree – strongly agree |

|    |                                                                                                                                                                   |                                                                                                                                                                                                                                                                                                                                                                                                                                                    |
|----|-------------------------------------------------------------------------------------------------------------------------------------------------------------------|----------------------------------------------------------------------------------------------------------------------------------------------------------------------------------------------------------------------------------------------------------------------------------------------------------------------------------------------------------------------------------------------------------------------------------------------------|
|    | • Home disinfectant                                                                                                                                               | Strongly disagree- disagree-somewhat disagree –neither agree nor disagree – somewhat agree – agree – strongly agree                                                                                                                                                                                                                                                                                                                                |
|    | • Disposable towels                                                                                                                                               | Strongly disagree- disagree-somewhat disagree –neither agree nor disagree – somewhat agree – agree – strongly agree                                                                                                                                                                                                                                                                                                                                |
|    | • Medical or surgical masks                                                                                                                                       | Strongly disagree- disagree-somewhat disagree –neither agree nor disagree – somewhat agree – agree – strongly agree                                                                                                                                                                                                                                                                                                                                |
|    | • Disposable gloves                                                                                                                                               | Strongly disagree- disagree-somewhat disagree –neither agree nor disagree – somewhat agree – agree – strongly agree                                                                                                                                                                                                                                                                                                                                |
| 13 | What extra protective measures have been taken to protect yourself and your housemates against transmission from your sick housemate (multiple answers possible)? | Sleeping in bed alone / no hugging, kissing or intercourse / use separate cutlery, cups, glasses / use separate meals / separate towels / extra cleaning of sanitary facilities and frequently used surfaces such as door handles / separate use of devices such as computer, mobile and lpad / use of your own toilet / use surgical mask by housemates / extra ventilation of the room where your sick housemate was / other / none of the above |

Baseline questionnaire, filled in by all adults (above 16 years) within the household

| NR. | BASELINE PARTICIPANT QUESTIONNAIRE ADULT                                                                                   | ANSWER OPTION                                                                                                                                                                                                                                                                                                |
|-----|----------------------------------------------------------------------------------------------------------------------------|--------------------------------------------------------------------------------------------------------------------------------------------------------------------------------------------------------------------------------------------------------------------------------------------------------------|
| 1   | What is your country of birth?                                                                                             | Open text field                                                                                                                                                                                                                                                                                              |
| 2   | Do you have payed work at this moment?                                                                                     | Yes / No                                                                                                                                                                                                                                                                                                     |
| 3   | Do you work in (more answers possible)?                                                                                    | Patient care/ childcare / primary or secondary education / higher education / none of them                                                                                                                                                                                                                   |
| 4   | Are you a pupil/student?                                                                                                   | Yes / No                                                                                                                                                                                                                                                                                                     |
| 5   | In the past 2 weeks, did you left the home for work, traveling in public transport or socializing?                         | Yes / No                                                                                                                                                                                                                                                                                                     |
| 6   | Have you been abroad in the past 2 weeks?                                                                                  | Yes / No                                                                                                                                                                                                                                                                                                     |
| 7   | Which countries did you visit?                                                                                             | Open text field                                                                                                                                                                                                                                                                                              |
| 8   | What is the highest level of education that you have completed with a diploma?                                             | For the Netherlands:<br>VMBO, MAVO,<br>LBO/HAVO/VWO/MBO, MTS/HBO,<br>university)/no education completed<br><br>For Belgium:<br>lager onderwijs/beroepssecundair<br>onderwijs (BSO)/technisch<br>secundair onderwijs<br>(TSO)/algemeen secundair<br>onderwijs (ASO)/hoger onderwijs/no<br>education completed |
| 9   | What is your height in meters?                                                                                             | Open text field                                                                                                                                                                                                                                                                                              |
| 10  | What is your weight in kilograms?                                                                                          | Open text field                                                                                                                                                                                                                                                                                              |
| 11  | When was the last time you had symptoms of your upper airways with a nose cold and cough, possibly accompanied by a fever? | At this moment / less than 2 weeks ago / between 2 and 4 weeks ago / more than 4 weeks ago                                                                                                                                                                                                                   |
| 12  | Do you have any of the following chronic conditions, diagnosed by a medical doctor (multiple answers possible)?            | Heart disease / lung disease (e.g. asthma or COPD) / immune disorder / diabetes / rheumatism / none                                                                                                                                                                                                          |

|    |                                                                                                                                                    |                                                                                                                         |
|----|----------------------------------------------------------------------------------------------------------------------------------------------------|-------------------------------------------------------------------------------------------------------------------------|
| 13 | Are you currently taking doctor-prescribed medications for your chronic condition?                                                                 | Yes / No                                                                                                                |
| 14 | Which medicines do you use for your chronic condition?                                                                                             | Open text field                                                                                                         |
| 15 | Are you currently being treated for cancer?                                                                                                        | Yes / No                                                                                                                |
| 16 | Are you currently taking any medications prescribed by your doctor to treat your cancer?                                                           | Yes / No                                                                                                                |
| 17 | What medications are you using to treat your cancer?                                                                                               | Open text field                                                                                                         |
| 18 | Do you have direct care responsibilities for your housemate who has the coronavirus infection?                                                     | No / Yes / I am the ill housemate                                                                                       |
|    | <b>Please indicate the extent to which you agree with the following:</b>                                                                           |                                                                                                                         |
| 19 | I know where to find information about preventing the spread of infection in my home when living with a person who is ill with the new coronavirus | Strongly disagree / disagree / somewhat disagree / neither agree nor disagree / somewhat agree / agree / strongly agree |
| 20 | I have received enough advice about what to do to prevent the spread of infection while living with someone who is ill with the new coronavirus    | Strongly disagree / disagree / somewhat disagree / neither agree nor disagree / somewhat agree / agree / strongly agree |
| 21 | I am confident I can protect myself from becoming infected with the new coronavirus                                                                | Strongly disagree / disagree / somewhat disagree / neither agree nor disagree / somewhat agree / agree / strongly agree |
| 22 | I believe that the following recommendations will prevent spread of infection in my household:                                                     |                                                                                                                         |
|    | • Washing hands more often                                                                                                                         | Strongly disagree / disagree / somewhat disagree / neither agree nor disagree / somewhat agree / agree / strongly agree |
|    | • Using soap when washing hands                                                                                                                    | Strongly disagree / disagree / somewhat disagree / neither agree                                                        |

|  |                                                                                        |                                                                                                                         |
|--|----------------------------------------------------------------------------------------|-------------------------------------------------------------------------------------------------------------------------|
|  |                                                                                        | nor disagree / somewhat agree / agree / strongly agree                                                                  |
|  | • Not sharing plates, cups and utensils                                                | Strongly disagree / disagree / somewhat disagree / neither agree nor disagree / somewhat agree / agree / strongly agree |
|  | • Wearing a mask in the home when in the same room as the person who is ill            | Strongly disagree / disagree / somewhat disagree / neither agree nor disagree / somewhat agree / agree / strongly agree |
|  | • Wearing a mask in the home when <b>not</b> in the same room as the person who is ill | Strongly disagree / disagree / somewhat disagree / neither agree nor disagree / somewhat agree / agree / strongly agree |
|  | • Sleeping in a different bedroom to the person who is ill                             | Strongly disagree / disagree / somewhat disagree / neither agree nor disagree / somewhat agree / agree / strongly agree |

Baseline child (0-15 year) questionnaire, filled in by the head of the household

| <b>NR.</b> | <b>BASELINE PARTICIPANT QUESTIONNAIRE CHILD</b>                                                                                          | <b>ANSWER OPTION</b>                                                                                |
|------------|------------------------------------------------------------------------------------------------------------------------------------------|-----------------------------------------------------------------------------------------------------|
| 1          | In which country was your child born?                                                                                                    | Open text field                                                                                     |
| 2          | Has your child been abroad in the past 2 weeks?                                                                                          | Yes / No                                                                                            |
| 3          | Which country-(ies) did your child visit?                                                                                                | Open text field                                                                                     |
| 4          | Has your child made use of (emergency) care at school / after-school care / child daycare in the past 2 weeks?                           | Yes / No                                                                                            |
| 5          | What is the height in meters of your child?                                                                                              | Open text field                                                                                     |
| 6          | What is the weight in kilograms of your child?                                                                                           | Open text field                                                                                     |
| 7          | When was the last time your child experienced symptoms of the upper airways with a nose cold and cough, possibly accompanied by a fever? | At this moment / less than 2 weeks ago / between 2 and 4 weeks ago / more than 4 weeks ago          |
| 8          | Does your child have any of the following chronic conditions, diagnosed by a medical doctor (multiple answers possible)?                 | Heart disease / lung disease (e.g. asthma or COPD) / immune disorder / diabetes / rheumatism / none |
| 9          | Is your child currently taking any medications prescribed by the doctor for his / her chronic condition?                                 | Yes / No                                                                                            |
| 10         | Which medicines does your child use for the chronic condition?                                                                           | Open text field                                                                                     |
| 11         | Is your child currently being treated for cancer?                                                                                        | Yes / No                                                                                            |
| 12         | Is your child currently taking any medications prescribed by the doctor to treat the cancer?                                             | Yes / No                                                                                            |
| 13         | What medications is your child taking to treat the cancer?                                                                               | Open text field                                                                                     |

End of study questionnaire, filled in by the head of the household

| NR | STUDY END QUESTIONNAIRE ACCOUNT MEMBER                                                                     | ANSWER OPTION                                                                                                      |
|----|------------------------------------------------------------------------------------------------------------|--------------------------------------------------------------------------------------------------------------------|
| 1  | How many additional people in your household were diagnosed with a coronavirus infection during the study? | Number                                                                                                             |
|    | <b>During the follow-up of the household study:</b>                                                        |                                                                                                                    |
| 2  | I have felt cheerful and in good spirits                                                                   | all of the time/most of the time/more than half of the time/less than half of the time/some of the time/at no time |
| 3  | I have felt calm and relaxed                                                                               | all of the time/most of the time/more than half of the time/less than half of the time/some of the time/at no time |
| 4  | I have felt active and vigorous                                                                            | all of the time/most of the time/more than half of the time/less than half of the time/some of the time/at no time |
| 5  | I woke up feeling fresh and rested                                                                         | all of the time/most of the time/more than half of the time/less than half of the time/some of the time/at no time |
| 6  | My daily life has been filled with things that interest me                                                 | all of the time/most of the time/more than half of the time/less than half of the time/some of the time/at no time |
| 7  | Have you or anyone in your household encountered any technical difficulties using the App?                 | Yes/No                                                                                                             |
| 8  | What problems have you and/or your housemates experienced?                                                 | Open text field                                                                                                    |
